# Supplementary material for: Molecular Dynamics Simulation of Association Processes in Aqueous Solutions of Maleate Salts of Drug-like Compounds: The Role of Counterion
Source: MDPI journal article supplement (doi:10.3390/ijms23116302), 2022-06-04
Supplement: s1 [file s1]

**Molecular dynamics simulation of association processes in aqueous solutions of maleate salts of drug-like compounds. The role of counterion.**

Mikhail V. Vener<sup>1\*</sup>, Denis E. Makhrov<sup>2</sup>, Alexander P. Voronin<sup>3</sup>, Daria R. Shalafan<sup>3,4</sup>

*1- Kurnakov Institute of General and Inorganic Chemistry, Russian Academy of Sciences,  
Leninskii prosp. 31, Moscow 119991, Russia; [vener@igic.ras.ru](mailto:vener@igic.ras.ru)*

*2- Faculty of Natural Science, Mendeleev University of Chemical Technology, Miusskaya  
Square 9, Moscow 125047, Russia; [Denis\\_Makhrov@muctr.ru](mailto:Denis_Makhrov@muctr.ru)*

*3- G.A. Krestov Institute of Solution Chemistry RAS, 153045, Ivanovo, Russia; [apv@isc-ras.ru](mailto:apv@isc-ras.ru)*

*4- Ivanovo State University for Chemistry and Technology, 153000, Ivanovo, Russia;  
[drs@isc-ras.ru](mailto:drs@isc-ras.ru)*

## Section S1.

To evaluate the relative stability of heterodimers in comparison to solvate-separated ions, the classical potential of mean force  $W(R)$  was calculated using [s1]:

$$W(R) = -k_B T \ln\{\text{RDF}(R)\}, \quad (\text{S1})$$

where  $k_B$  is the Boltzmann constant,  $T$  is the temperature, and  $\text{RDF}(R)$  is the radial distribution function obtained from the MD calculations (Fig. 3). The classical potential of mean force for both systems is shown in Figure S1. The generated classical potential of mean forces show the expected features for association of polyatomic organic ions in water [s2, s3, s4, s5, s6].

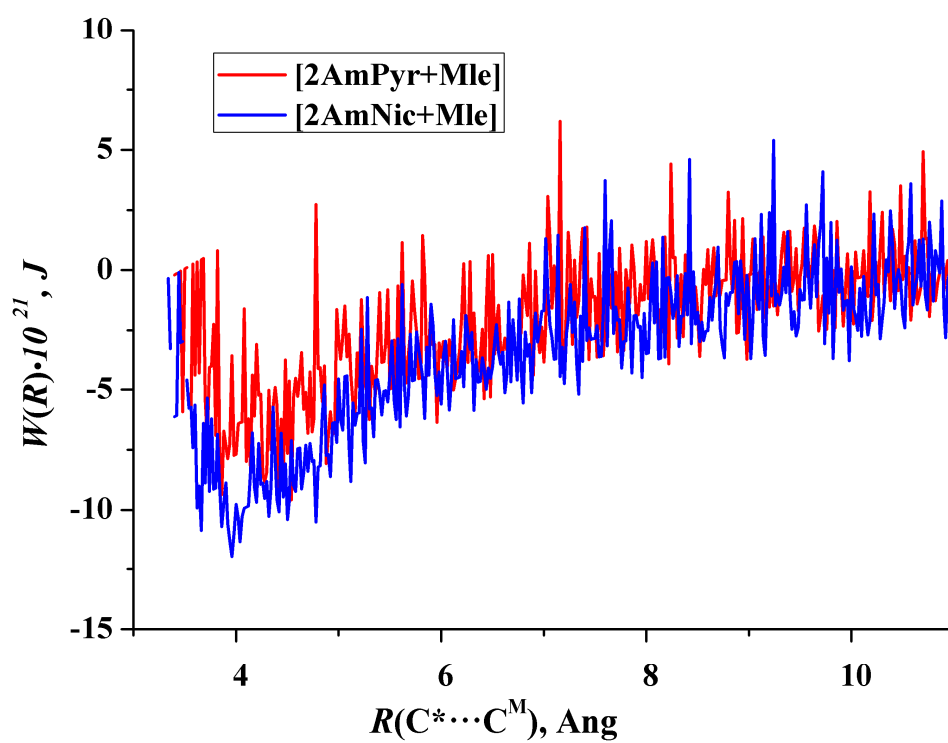

Figure S1. The classical potential of mean force  $W(R)$  for the  $[2\text{AmPyr} + \text{Mle}]$  and  $[2\text{AmNic} + \text{Mle}]$  systems.

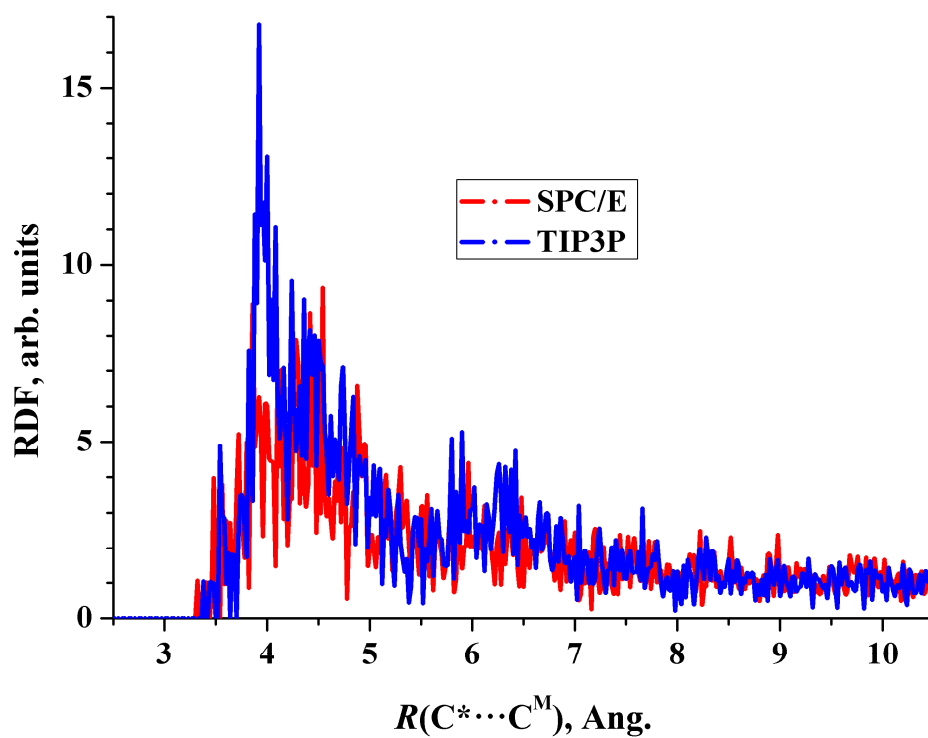

Figure S2. The radial distribution function (RDF) of the  $R[C^*\cdots C^M]$  distance of the [2AmPyr + Mle] system obtained from the 100 ns NPT simulations with SPC/E and TIP3P models of water.

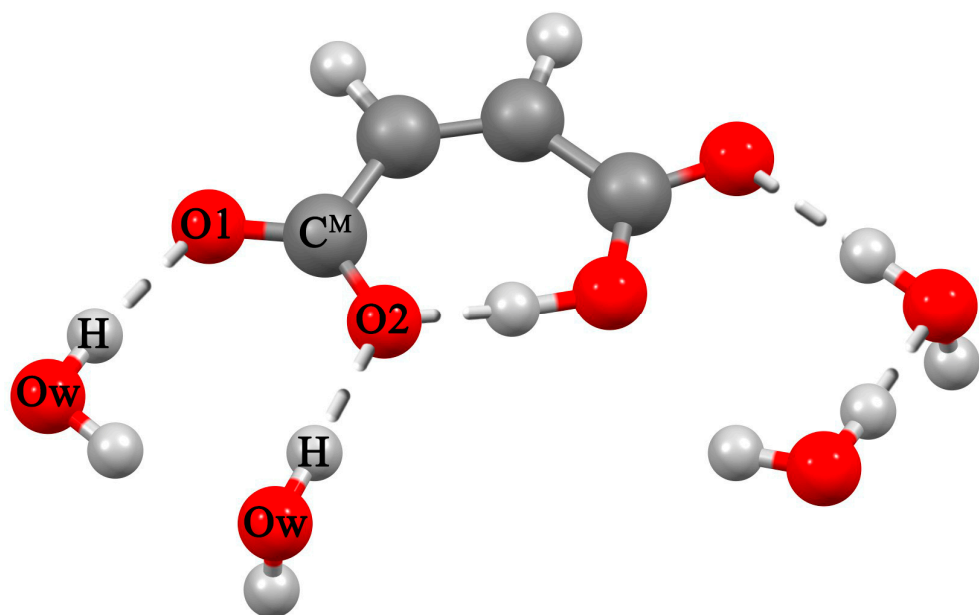

Figure S3. The structure of the hydrated Mle anion.

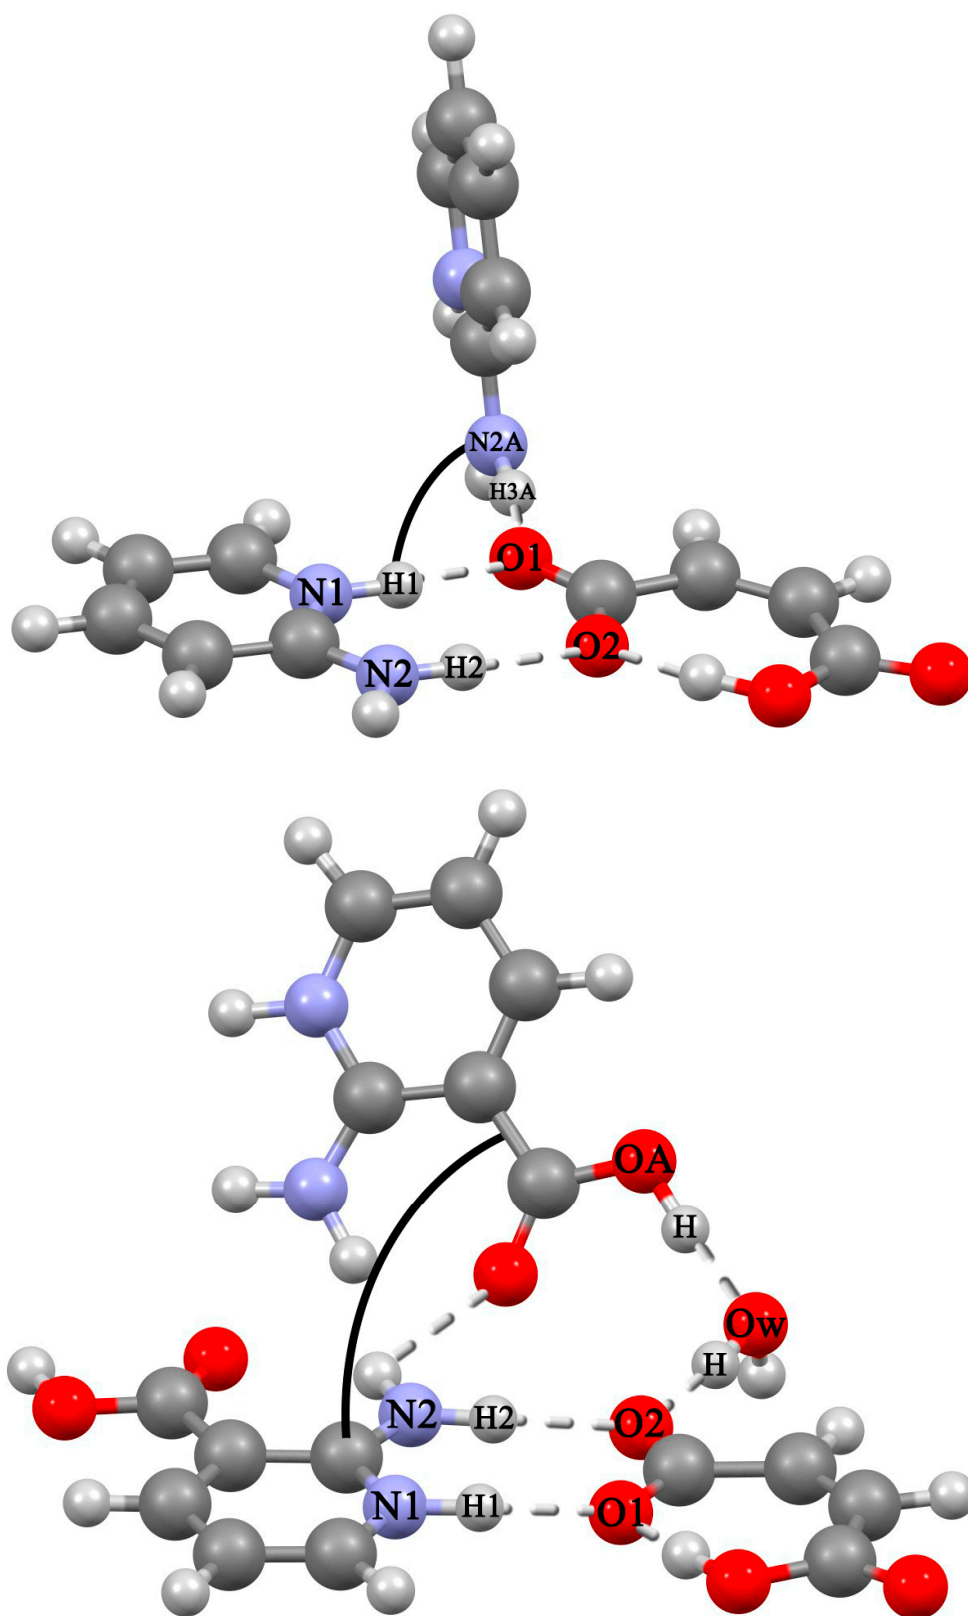

Figure S4. H-bond networks in crystalline [2AmPyr+Mle] (1:1) [37] (upper panel) and [2AmNic+Mle+H<sub>2</sub>O] (1:1:1) [9] (lower panel). H-bonds are denoted by dotted lines.

Table S1. B3LYP/6-31G\*\* values of the (H $\cdots$ O) distance  $R(\text{H}\cdots\text{O})$ , the electron density  $\rho_b$  at the H $\cdots$ O bond critical point and the frequency of the N–H stretching vibrations  $\nu(\text{N–H})^a$  of heterodimers [2AmPyr+Mle] and [2AmNic+Mle] in water (PCM model). The H-bond enthalpy  $\Delta H_{HB}$  (Eq. 1) and energy  $E_{HB}$  (Eq. 2) are given in the last two columns.

| H-bond <sup>a)</sup> | $R(\text{H}\cdots\text{O})$ ,<br>Å | $\nu(\text{N–H})^b$ , cm <sup>-1</sup> | $\rho_b$ , a.u. | $-\Delta H_{HB}$ , kJ/mol | $E_{HB}$ , kJ/mol |
|----------------------|------------------------------------|----------------------------------------|-----------------|---------------------------|-------------------|
| [2AmPyr+Mle]         |                                    |                                        |                 |                           |                   |
| N1–H1 $\cdots$ O1    | 1.777                              | 2823 (2292)                            | 0.0408          | 26.0                      | 28.7              |
| N2–H2 $\cdots$ O2    | 1.859                              | 3224 <sup>d)</sup> (1360)              | 0.0324          | 22.7                      | 24.3              |
| [2AmNic+Mle]         |                                    |                                        |                 |                           |                   |
| N1–H1 $\cdots$ O1    | 1.718                              | 2817 (2080)                            | 0.0457          | 28.9                      | 33.8              |
| N2–H2 $\cdots$ O2    | 1.870                              | 3182 <sup>c)</sup> (1103)              | 0.0324          | 22.3                      | 23.5              |

<sup>a)</sup> scaling factor is 0.9648; <sup>b)</sup> see Fig. S4; <sup>c)</sup> IR intensity (km/mol) is given in parenthesis;

<sup>d)</sup> asymmetric stretching vibrations of the NH<sub>2</sub> group

**Table S2.** B3LYP/6-31G\*\* values of the (H $\cdots$ O) distance  $R(\text{H}\cdots\text{O})$ , the electron density  $\rho_b$  at the H $\cdots$ O bond critical point and the frequency of the N–H/O–H stretching vibrations  $\nu(\text{N–H})/\nu(\text{O–H})^a$  of trimers [2AmPyr+Mle+2AmPyr] and [2AmNic+Mle+2AmNic+H<sub>2</sub>O] in water (PCM model). The H-bond enthalpy  $\Delta H_{HB}$  (Eq. 1) and energy  $E_{HB}$  (Eq. 2) are given in the last two columns.

| H-bond <sup>b)</sup>                 | $R(\text{H}\cdots\text{O})$ ,<br>Å | $\nu(\text{N–H})/\nu(\text{O–H})^c$ ,<br>cm <sup>-1</sup> | $\rho_b$ , a.u. | $-\Delta H_{HB}$ , kJ/mol | $E_{HB}$ , kJ/mol |
|--------------------------------------|------------------------------------|-----------------------------------------------------------|-----------------|---------------------------|-------------------|
| [2AmPyr+Mle+2AmPyr]                  |                                    |                                                           |                 |                           |                   |
| N1–H1 $\cdots$ O1                    | 1.738                              | 2837 (2488)                                               | 0.0538          | 27.9                      | 42.6              |
| N2–H2 $\cdots$ O2                    | 1.950                              | 3270 (1132)                                               | 0.0378          | 19.6                      | 30.5              |
| O1 $\cdots$ H3A–N2A                  | 1.870                              | 3230 (1382)                                               | 0.0341          | 22.3                      | 27.0              |
| [2AmNic+Mle+2AmNic+H <sub>2</sub> O] |                                    |                                                           |                 |                           |                   |
| N1–H1 $\cdots$ O1                    | 1.771                              | 2902 (1868)                                               | 0.0636          | 26.3                      | 49.8              |
| N2–H2 $\cdots$ O2                    | 1.852                              | 3217 <sup>d)</sup> (1385)                                 | 0.0394          | 23.0                      | 30.7              |
| O2 $\cdots$ H–Ow                     | 1.710                              | 3217 <sup>d)</sup> (1385)                                 | 0.0399          | 29.3                      | 33.2              |
| Ow $\cdots$ H–OA                     | 1.532                              | 2526 <sup>e)</sup> (1451)                                 | 0.0603          | 40.9                      | 46.4              |

<sup>a)</sup> scaling factor is 0.9648; <sup>b)</sup> see Fig. S4; <sup>c)</sup> IR intensity (km/mol) is given in parenthesis;

<sup>d)</sup> asymmetric stretching vibrations of the NH<sub>2</sub> group strongly coupled with Ow–H stretch;

<sup>e)</sup> OA–H stretching vibration strongly coupled with intramolecular H-bond stretch

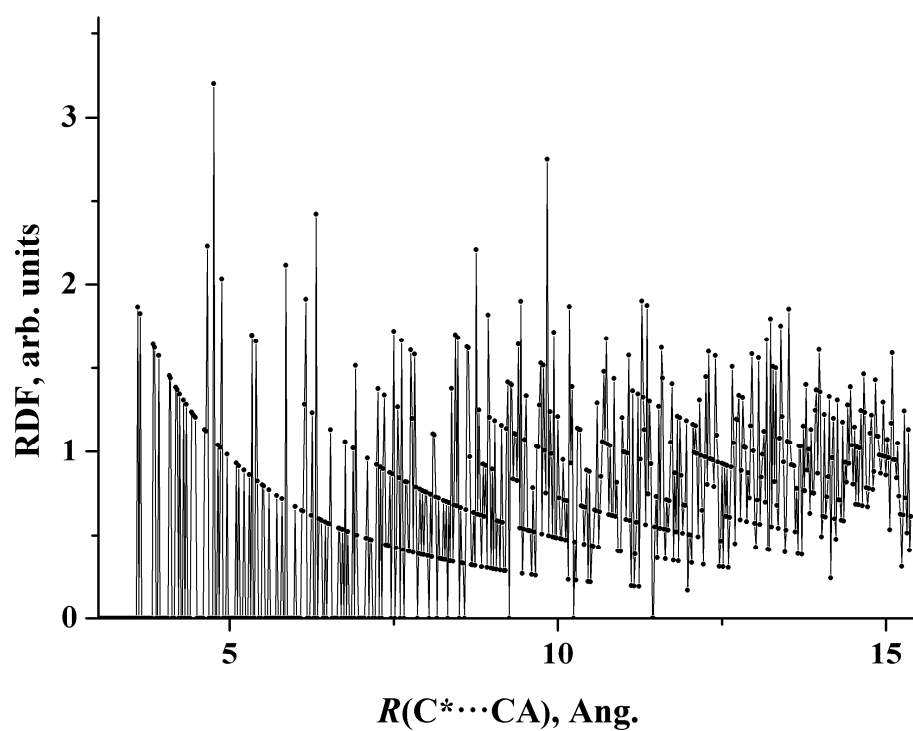

Figure S5. The radial distribution function of the  $R[C^*\cdots CA]$  distance obtained from the 100 ns *NPT* simulations of 2AmPyr and Mle in the 2x1x1 cell.



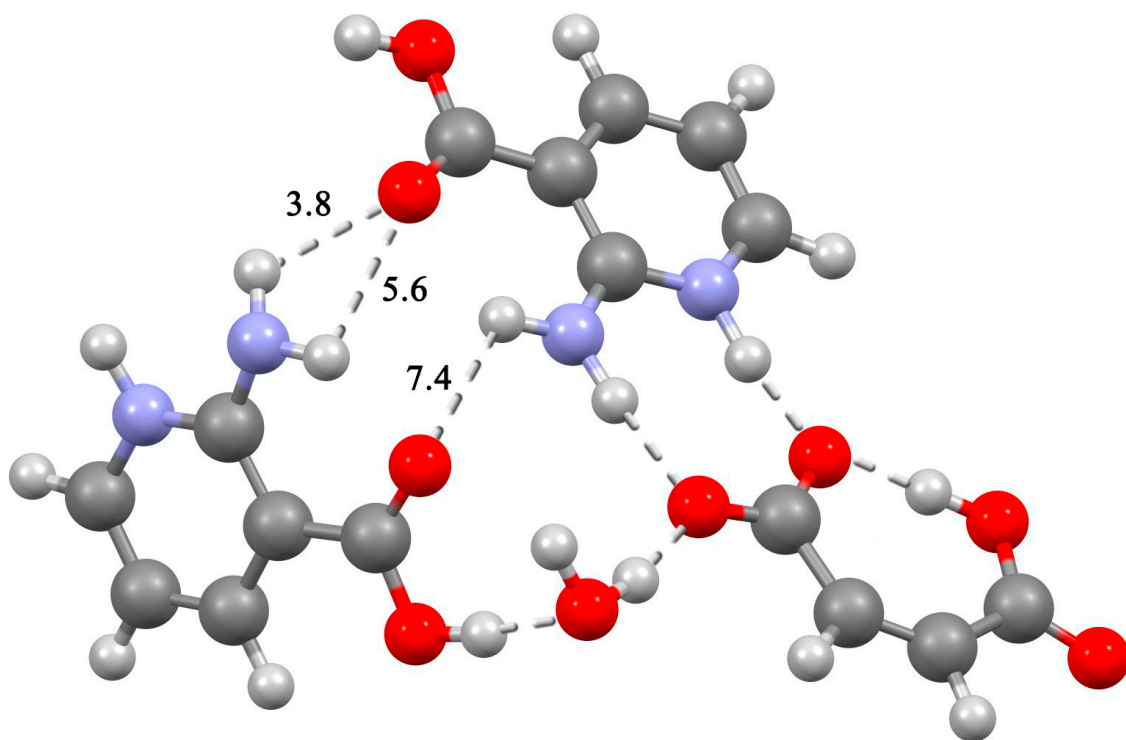

Figure S6. Several weak intermolecular interactions between two 2AmNic cations identified by the Bader electron density analysis followed by formula (2). Units are kJ/mol.

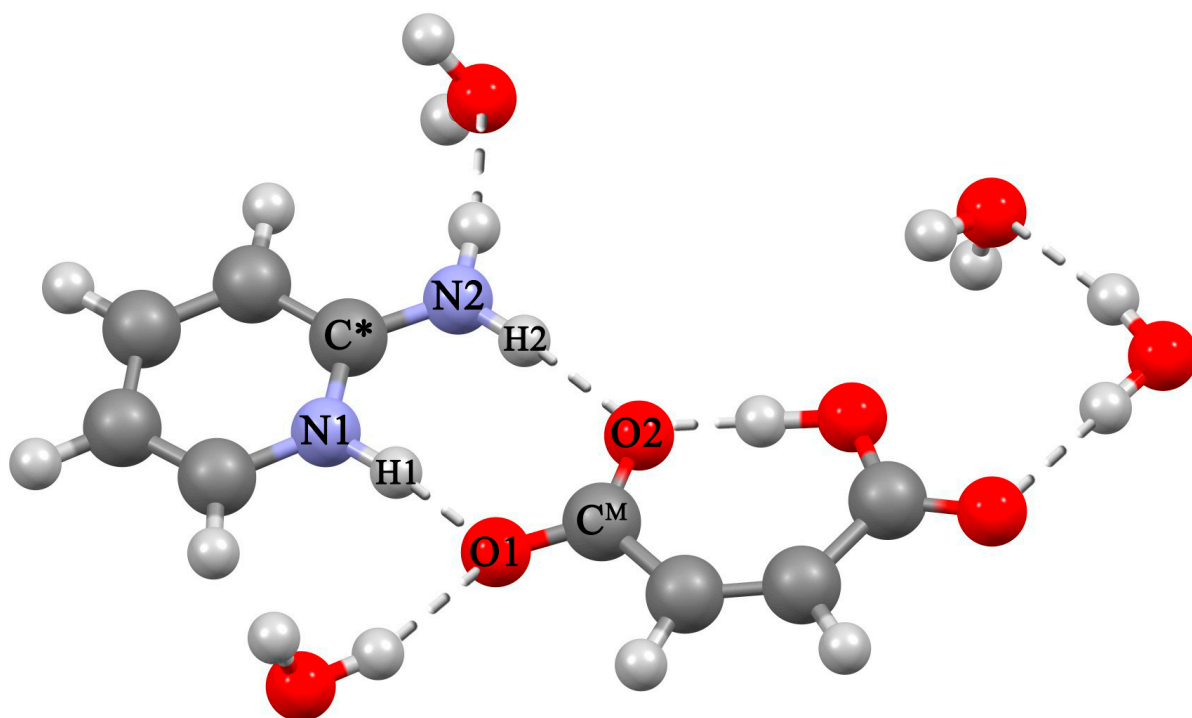

Figure S7. Structure of the [2AmNic+Mle] dimer hydrated with water molecules used in the calculation of the IR spectrum within the discrete-continuum approximation.

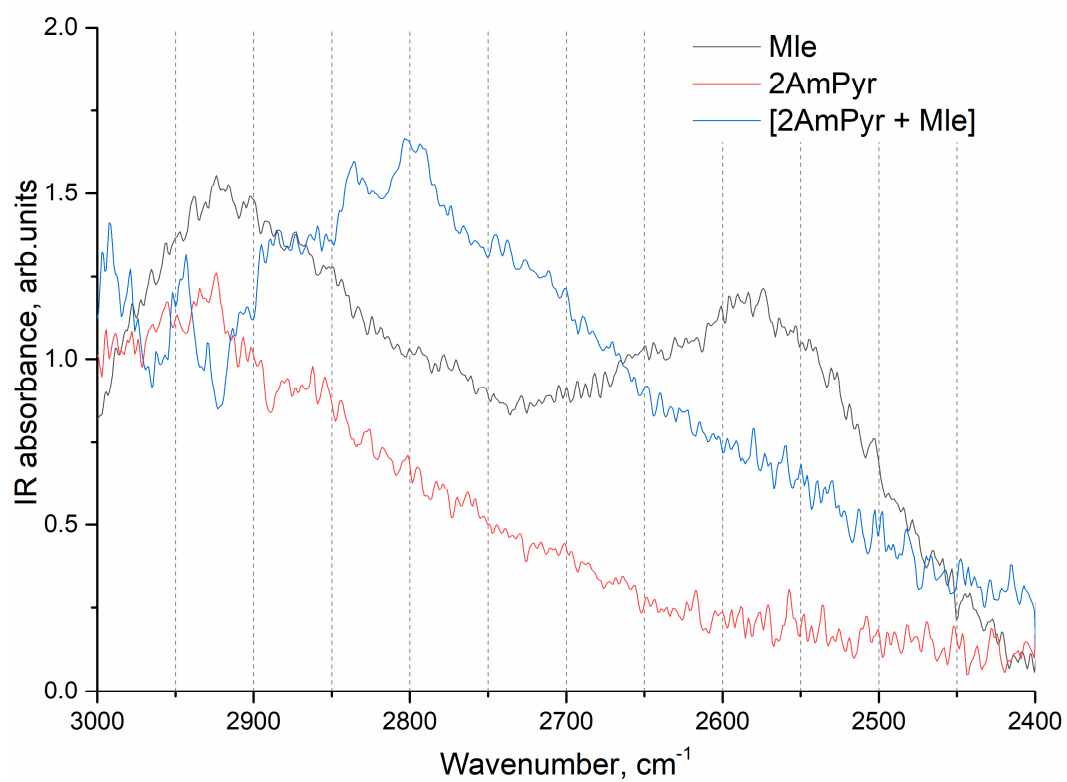

Figure S8. Comparison of the spectrum of [2AmPyr + Mle] with the spectrum of an aqueous solution of 2AmPyr and Mle of the same concentration in the range of 3000 – 2400 cm<sup>-1</sup>.

## References

- s1. Shih, O.; England, A.H.; Dallinger, G.C.; Smith, J.W.; Duffey, K.C.; Cohen, R.C.; Prendergast, D.; Saykally, R.J. Cation-cation contact pairing in water: Guanidinium. *J. Chem. Phys.* **2013**, *139*, 035104.
- s2. Rozanska, X.; Chipot, C. Modeling ion–ion interaction in proteins: A molecular dynamics free energy calculation of the guanidinium-acetate association. *J. Chem. Phys.* **2000**, *112*, 9691-9694.
- s3. Debiec, K.T.; Gronenborn, A.M.; Chong, L.T. Evaluating the Strength of Salt Bridges: A Comparison of Current Biomolecular Force Fields. *J. Phys. Chem. B* **2014**, *118*, 6561–6569.
- s4. Chowdhury, R.; Nandi, S.; Halder, R.; Jana, B.; Bhattacharyya, K. Structural relaxation of acridine orange dimer in bulk water and inside a single live lung cell. *J. Chem. Phys.* **2016**, *144*, 065101.
- s5. Mak, C.H. Unraveling Base Stacking Driving Forces in DNA. *J. Phys. Chem. B* **2016**, *120*, 6010–6020.
- s6. Kruchinin, S.E.; Fedotova, M.V. Ion Pairing of the Neurotransmitters Acetylcholine and Glutamate in Aqueous Solutions. *J. Phys. Chem. B* **2021**, *125*, 11219-11231.

Section S2. Topological file of the maleic acid monoanion.

[ moleculetype ]

; Name nrexcl

maleate 3

[ atoms ]

| ; nr | type     | resnr | residue | atom | cgnr | charge    | mass    |
|------|----------|-------|---------|------|------|-----------|---------|
| 1    | opls_268 | 1     | MAL     | O1   | 1    | -0.823123 | 15.9990 |
| 2    | opls_270 | 1     | MAL     | H1   | 1    | 0.614049  | 1.0080  |
| 3    | opls_269 | 1     | MAL     | O2   | 1    | -0.707777 | 15.9990 |
| 4    | opls_267 | 1     | MAL     | C1   | 1    | 0.907584  | 12.0110 |
| 5    | opls_142 | 1     | MAL     | C2   | 1    | -0.327958 | 12.0110 |
| 6    | opls_144 | 1     | MAL     | H2   | 1    | 0.144250  | 1.0080  |
| 7    | opls_142 | 1     | MAL     | C3   | 1    | -0.327958 | 12.0110 |
| 8    | opls_144 | 1     | MAL     | H3   | 1    | 0.144250  | 1.0080  |
| 9    | opls_267 | 1     | MAL     | C4   | 1    | 0.907584  | 12.0110 |
| 10   | opls_268 | 1     | MAL     | O3   | 1    | -0.823123 | 15.9990 |
| 11   | opls_269 | 1     | MAL     | O4   | 1    | -0.707777 | 15.9990 |

; Stretchings

[ bonds ]

|   |    |   |        |            |
|---|----|---|--------|------------|
| 1 | 2  | 1 | 0.1204 | 705.913    |
| 1 | 4  | 1 | 0.1298 | 434106.036 |
| 3 | 4  | 1 | 0.1235 | 622576.711 |
| 4 | 5  | 1 | 0.1516 | 220874.352 |
| 5 | 6  | 1 | 0.1097 | 322191.879 |
| 5 | 7  | 1 | 0.1348 | 484343.743 |
| 7 | 8  | 1 | 0.1097 | 322191.879 |
| 7 | 9  | 1 | 0.1515 | 220874.352 |
| 2 | 10 | 1 | 0.1201 | 705.913    |
| 9 | 10 | 1 | 0.1298 | 434106.036 |
| 9 | 11 | 1 | 0.1235 | 622576.711 |

; Bendings

[ angles ]

|    |    |    |   |        |          |
|----|----|----|---|--------|----------|
| 2  | 1  | 4  | 1 | 111.60 | 301.9870 |
| 1  | 2  | 10 | 1 | 178.64 | 184.6965 |
| 1  | 4  | 3  | 1 | 124.84 | 867.1869 |
| 1  | 4  | 5  | 1 | 118.23 | 409.6539 |
| 3  | 4  | 5  | 1 | 116.93 | 300.2586 |
| 4  | 5  | 6  | 1 | 111.17 | 330.6109 |
| 4  | 5  | 7  | 1 | 130.85 | 623.4973 |
| 6  | 5  | 7  | 1 | 117.98 | 305.0995 |
| 5  | 7  | 8  | 1 | 117.99 | 305.0995 |
| 5  | 7  | 9  | 1 | 130.85 | 623.4973 |
| 8  | 7  | 9  | 1 | 111.16 | 330.6109 |
| 7  | 9  | 10 | 1 | 118.24 | 409.6539 |
| 7  | 9  | 11 | 1 | 116.96 | 300.2586 |
| 2  | 10 | 9  | 1 | 111.58 | 301.9870 |
| 10 | 9  | 11 | 1 | 124.80 | 867.1869 |

; Torsions

[ dihedrals ]

|   |   |    |    |   |        |        |   |
|---|---|----|----|---|--------|--------|---|
| 2 | 1 | 4  | 3  | 1 | 179.97 | 13.451 | 2 |
| 2 | 1 | 4  | 5  | 1 | 179.97 | 3.851  | 2 |
| 4 | 1 | 2  | 10 | 1 | 179.21 | 0.011  | 2 |
| 1 | 2 | 10 | 9  | 1 | 180.80 | 0.011  | 2 |
| 1 | 4 | 5  | 6  | 1 | 180.04 | -3.117 | 2 |
| 1 | 4 | 5  | 7  | 1 | 180.04 | 4.013  | 2 |
| 3 | 4 | 5  | 6  | 1 | 180.03 | -0.345 | 2 |
| 3 | 4 | 5  | 7  | 1 | 180.04 | -7.520 | 2 |
| 4 | 5 | 7  | 8  | 1 | 179.99 | 29.536 | 2 |
| 4 | 5 | 7  | 9  | 1 | 180.00 | 3.652  | 2 |
| 6 | 5 | 7  | 8  | 1 | 180.00 | 19.789 | 2 |
| 6 | 5 | 7  | 9  | 1 | 180.01 | 29.536 | 2 |
| 5 | 7 | 9  | 10 | 1 | 179.97 | 4.013  | 2 |
| 5 | 7 | 9  | 11 | 1 | 179.97 | -7.520 | 2 |

|    |   |    |    |   |        |         |   |
|----|---|----|----|---|--------|---------|---|
| 8  | 7 | 9  | 10 | 1 | 179.98 | -3.117  | 2 |
| 8  | 7 | 9  | 11 | 1 | 179.98 | -0.345  | 2 |
| 7  | 9 | 10 | 2  | 1 | 180.01 | 3.851   | 2 |
| 11 | 9 | 10 | 2  | 1 | 180.01 | 13.451  | 2 |
| 5  | 1 | 3  | 4  | 2 | 0.0    | 594.858 |   |
| 5  | 4 | 7  | 6  | 2 | -0.0   | 124.419 |   |
| 9  | 5 | 8  | 7  | 2 | -0.0   | 136.508 |   |
| 9  | 7 | 11 | 10 | 2 | -0.0   | 873.561 |   |

; Nonbonded terms

[ pairs ]

; 1-4 interactions

|   |    |   |       |       |       |        |           |
|---|----|---|-------|-------|-------|--------|-----------|
| 1 | 6  | 2 | 0.833 | 0.000 | 0.000 | 0.0000 | 0.0000000 |
| 1 | 7  | 2 | 0.833 | 0.000 | 0.000 | 0.0000 | 0.0000000 |
| 1 | 9  | 2 | 0.833 | 0.000 | 0.000 | 0.0000 | 0.0000000 |
| 2 | 3  | 2 | 0.833 | 0.000 | 0.000 | 0.0000 | 0.0000000 |
| 2 | 5  | 2 | 0.833 | 0.000 | 0.000 | 0.0000 | 0.0000000 |
| 2 | 7  | 2 | 0.833 | 0.000 | 0.000 | 0.0000 | 0.0000000 |
| 2 | 11 | 2 | 0.833 | 0.000 | 0.000 | 0.0000 | 0.0000000 |
| 3 | 6  | 2 | 0.833 | 0.000 | 0.000 | 0.0000 | 0.0000000 |
| 3 | 7  | 2 | 0.833 | 0.000 | 0.000 | 0.0000 | 0.0000000 |
| 4 | 8  | 2 | 0.833 | 0.000 | 0.000 | 0.0000 | 0.0000000 |
| 4 | 9  | 2 | 0.833 | 0.000 | 0.000 | 0.0000 | 0.0000000 |
| 4 | 10 | 2 | 0.833 | 0.000 | 0.000 | 0.0000 | 0.0000000 |
| 5 | 10 | 2 | 0.833 | 0.000 | 0.000 | 0.0000 | 0.0000000 |
| 5 | 11 | 2 | 0.833 | 0.000 | 0.000 | 0.0000 | 0.0000000 |
| 6 | 8  | 2 | 0.833 | 0.000 | 0.000 | 0.0000 | 0.0000000 |
| 6 | 9  | 2 | 0.833 | 0.000 | 0.000 | 0.0000 | 0.0000000 |
| 8 | 10 | 2 | 0.833 | 0.000 | 0.000 | 0.0000 | 0.0000000 |
| 8 | 11 | 2 | 0.833 | 0.000 | 0.000 | 0.0000 | 0.0000000 |
| 1 | 8  | 2 | 1.000 | 0.000 | 0.000 | 0.0000 | 0.0000000 |
| 1 | 11 | 2 | 1.000 | 0.000 | 0.000 | 0.0000 | 0.0000000 |
| 2 | 6  | 2 | 1.000 | 0.000 | 0.000 | 0.0000 | 0.0000000 |
| 2 | 8  | 2 | 1.000 | 0.000 | 0.000 | 0.0000 | 0.0000000 |

|   |    |   |       |       |       |        |            |
|---|----|---|-------|-------|-------|--------|------------|
| 3 | 8  | 2 | 1.000 | 0.000 | 0.000 | 0.0000 | 0.00000000 |
| 3 | 9  | 2 | 1.000 | 0.000 | 0.000 | 0.0000 | 0.00000000 |
| 3 | 10 | 2 | 1.000 | 0.000 | 0.000 | 0.0000 | 0.00000000 |
| 3 | 11 | 2 | 1.000 | 0.000 | 0.000 | 0.0000 | 0.00000000 |
| 4 | 11 | 2 | 1.000 | 0.000 | 0.000 | 0.0000 | 0.00000000 |
| 6 | 10 | 2 | 1.000 | 0.000 | 0.000 | 0.0000 | 0.00000000 |
| 6 | 11 | 2 | 1.000 | 0.000 | 0.000 | 0.0000 | 0.00000000 |

; Exclusions from default nonbonded

[ exclusions ]

; ai      aj

1    2

1    3

1    4

1    5

1    6

1    7

1    8

1    9

1    10

1    11

2    3

2    4

2    5

2    6

2    7

2    8

2    9

2    10

2    11

3    4

3    5

3    6

3    7



|    |    |
|----|----|
| 3  | 8  |
| 3  | 9  |
| 3  | 10 |
| 3  | 11 |
| 4  | 5  |
| 4  | 6  |
| 4  | 7  |
| 4  | 8  |
| 4  | 9  |
| 4  | 10 |
| 4  | 11 |
| 5  | 6  |
| 5  | 7  |
| 5  | 8  |
| 5  | 9  |
| 5  | 10 |
| 5  | 11 |
| 6  | 7  |
| 6  | 8  |
| 6  | 9  |
| 6  | 10 |
| 6  | 11 |
| 7  | 8  |
| 7  | 9  |
| 7  | 10 |
| 7  | 11 |
| 8  | 9  |
| 8  | 10 |
| 8  | 11 |
| 9  | 10 |
| 9  | 11 |
| 10 | 11 |
